# Supplementary material
Source: PubMed Central journal article supplement (PMC2915725)
Supplement: supp_M110.147843_jbc.M110.147843-3.pdf [file supp_M110.147843_jbc.M110.147843-3.pdf]

Table S1. DesKABD-homologous structures. The list was obtained using DALI, the scoring figures included follow the reported definitions of the algorithm. Key residues described in the text, are detailed on the last five columns, giving the equivalent residues for each homologous protein (for uncertain equivalence, a question mark is used; no equivalent residues are left as blank boxes).

| PDB                  | Z score | RMSD (Å) | lali | nres | %id | Resolution (Å) | PDB description                                | Glu289 | Asn293 | Lys296             | His297 | His335  |
|----------------------|---------|----------|------|------|-----|----------------|------------------------------------------------|--------|--------|--------------------|--------|---------|
| <a href="#">1i59</a> | 13.8    | 2.3      | 119  | 180  | 24  | 1.80           | CHEMOTAXIS PROTEIN CheA                        | His405 | Asn409 | Asp412?<br>Arg408? | His413 | Arg503? |
| <a href="#">2c2a</a> | 13.7    | 2.5      | 121  | 240  | 21  | 1.90           | SENSOR HISTIDINE KINASE                        | Asn376 | Asn380 | Lys383             | Tyr384 | ?       |
| <a href="#">1ysr</a> | 13.7    | 2.6      | 119  | 137  | 18  | 1.78           | SENSOR-TYPE HISTIDINE KINASE PrrB              | Asn349 | Asn353 | Lys356             | His357 | Arg396? |
| <a href="#">1gkz</a> | 13.1    | 2.5      | 119  | 316  | 16  | 2.20           | 3-METHYL-2-OXOBUTANOATE DEHYDROGENASE          | Glu285 | Asn249 | Arg252             |        | ?       |
| <a href="#">1id0</a> | 12.9    | 2.6      | 118  | 146  | 18  | 1.60           | PhoQ HISTIDINE KINASE                          | Asn385 | Asn389 | Lys392             | Tyr393 | Arg434  |
| <a href="#">3d2r</a> | 12.8    | 2.6      | 119  | 362  | 16  | 2.03           | PYRUVATE DEHYDROGENASE [LIPOAMIDE] KINASE      | Glu254 | Asn258 | Arg261             |        | ?       |
| <a href="#">2bu8</a> | 12.7    | 2.6      | 119  | 359  | 18  | 2.50           | PYRUVATE DEHYDROGENASE KINASE ISOENZYME<br>2   | Glu243 | Asn247 | Arg250             |        | ?       |
| <a href="#">3d36</a> | 12.4    | 2.4      | 119  | 221  | 16  | 2.03           | SPORULATION KINASE B                           | Asn320 | Asn324 | Glu327             | Ala328 | ?       |
| <a href="#">1r62</a> | 12.3    | 2.5      | 111  | 136  | 14  | 1.60           | NITROGEN REGULATION PROTEIN NR(II)             | Asn244 | Asn248 | Gln251             | Ala252 | ?       |
| <a href="#">3cgz</a> | 11.5    | 2.9      | 112  | 143  | 17  | 1.90           | VIRULENCE SENSOR HISTIDINE KINASE PhoQ         | Asn386 | Asn390 | Lys393             |        | His423? |
| <a href="#">1til</a> | 10.6    | 2.2      | 98   | 141  | 18  | 2.70           | ANTI-SIGMA F FACTOR                            | Glu46  | Asn50  | Arg105?            |        | Arg105? |
| <a href="#">2ftk</a> | 9.4     | 2.8      | 106  | 182  | 8   | 3.05           | SPORULATION INITIATION PHOSPHOTRANSFERASE<br>B | Lys716 | Leu720 | Gln723             |        | ?       |
| <a href="#">1mx0</a> | 6.3     | 2.3      | 88   | 461  | 17  | 2.30           | TYPE II DNA TOPOISOMERASE VI SUBUNIT B         | Glu38  | Asn42  | Asp45              |        | ?       |
