# Supplementary material
Source: PubMed Central journal article supplement (PMC2915725)
Supplement: supp_M110.147843_jbc.M110.147843-4.pdf [file supp_M110.147843_jbc.M110.147843-4.pdf]

Table S2. Docking figures for the best scoring structures, comparing the DHp domain in different conformational states

| DHp functional state | Haddock's global score | Buried surface area ( $\text{\AA}^2$ ) | Haddock energy (kJ/mol) | Distance ATP $\gamma$ P - His188 $N_\epsilon$ ( $\text{\AA}$ ) |
|----------------------|------------------------|----------------------------------------|-------------------------|----------------------------------------------------------------|
| kinase               | -99.2                  | 1540                                   | -620                    | 3.08                                                           |
| phosphotransferase   | -73.3                  | 1271                                   | -263                    | 3.02                                                           |
| phosphatase          | -135                   | 1890                                   | -761                    | 8.7                                                            |
