# Supplementary material
Source: PubMed Central journal article supplement (PMC2915725)
Supplement: supp_M110.147843_jbc.M110.147843-5.pdf [file supp_M110.147843_jbc.M110.147843-5.pdf]

**Table S3. Summary of reported enzyme kinetic parameters of histidine kinases.**

| Enzyme           | Autophosphorylation Activity    |                         |                                                     |            |
|------------------|---------------------------------|-------------------------|-----------------------------------------------------|------------|
|                  | $k_{cat}$<br>(s <sup>-1</sup> ) | $K_M$ ATP<br>( $\mu$ M) | $k_{cat}/K_M$<br>(M <sup>-1</sup> s <sup>-1</sup> ) | References |
| DesKc            | $2.8 \times 10^{-3}$            | 64                      | 44                                                  | This work  |
| CheA             | 0.117                           | 274                     | 427                                                 | [1]        |
| CheA             | 0.026                           | 300                     | 87                                                  | [2]        |
| NRII             | 0.032                           | 18                      | 1805                                                | [3]        |
| NarX             | $5 \times 10^{-5}$              | 2.4                     | 21                                                  | [4]        |
| NarQ             | $2.2 \times 10^{-4}$            | 22.8                    | 9.65                                                |            |
| KinA             | $1.9 \times 10^{-3}$            | 74                      | 25.7                                                | [5]        |
| EnvZ115          | $8.1 \times 10^{-5}$            | 218                     | 0.37                                                | [6]        |
| PhoQc            | -                               | 20.1                    | -                                                   | [7]        |
| WalK(Spn) (VicK) | $1.7 \times 10^{-3}$            | 37                      | 46.0                                                | [8]        |

1. Surette, M.G., et al., *Dimerization is required for the activity of the protein histidine kinase CheA that mediates signal transduction in bacterial chemotaxis*. J Biol Chem, 1996. **271**(2): p. 939-45.
2. Tawa, P. and R.C. Stewart, *Mutational activation of CheA, the protein kinase in the chemotaxis system of Escherichia coli*. J Bacteriol, 1994. **176**(14): p. 4210-8.
3. Jiang, P. and A.J. Ninfa, *Regulation of autophosphorylation of Escherichia coli nitrogen regulator II by the PII signal transduction protein*. J Bacteriol, 1999. **181**(6): p. 1906-11.
4. Noriega, C.E., et al., *Autophosphorylation and dephosphorylation by soluble forms of the nitrate-responsive sensors NarX and NarQ from Escherichia coli K-12*. J Bacteriol, 2008. **190**(11): p. 3869-76.
5. Grimshaw, C.E., et al., *Synergistic kinetic interactions between components of the phosphorelay controlling sporulation in Bacillus subtilis*. Biochemistry, 1998. **37**(5): p. 1365-75.
6. Kenney, L.J., *Kinase activity of EnvZ, an osmoregulatory signal transducing protein of Escherichia coli*. Arch Biochem Biophys, 1997. **346**(2): p. 303-11.
7. Marina, A., et al., *Structural and mutational analysis of the PhoQ histidine kinase catalytic domain. Insight into the reaction mechanism*. J Biol Chem, 2001. **276**(44): p. 41182-90.
8. Gutu, A.D., et al., *Kinetic characterization of the WalRKSpn (VicRK) two-component system of Streptococcus pneumoniae: dependence of WalKSpn (VicK) phosphatase activity on its PAS domain*. J Bacteriol, 2010. **192**(9): p. 2346-58.
